# Supplementary material
Source: publisher figshare collection journal article supplement (https://gsapubs.figshare.com/ndownloader/files/23299274)
Supplement: Supplementary file 1 [file 23299274]

## Sheet: Supplemental Table 2
TABLE DR2C. GEOMORPHIC, CLIMATE, AND LAND COVER DATA FOR PANAMA WATERSHEDS IN THIS STUDY
	LAND COVER PARAMETERS					LAND COVER PARAMETERS
Basin ID	FOREST (%)	AGRICULTURAL LAND (%)	SHRUBLAND & GRASSLAND (%)	OPEN LAND (%)	WATER BODIES (%)	FOREST (m2)	AGRICULTURAL LAND (m2)	SHRUBLAND & GRASSLAND (m2)	OPEN LAND (m2)	WATER BODIES (m2)
BOCAS DEL TORO
1	81.8	15.7	2.5			348835000	67105600	10360500
2	84.3	13.7	2		84.3	361857000	58646100	8744640
3	86.9	13.1				147613000	22336900
4	87.4	10.5	2.1			126417000	15113000	3041610
5	91.129	8.87097				10645700	1045560
6	89.4	10.3	0.3			284771000	32982500	950505
7	96.2	0.757576	3			24332900	190101	760404
8	53.8	46.2				1330710	1140610
9	44.9	53.4	1.7			7604040	9029790	285151
10	21.875	78.125
11	65.4	34.6				9505050	5037670
12	62.9032	33.871	3.22581
13	58.5	41.3			0.2	30511200	21576500		95050.5
14	61.3	38.7				9029790	5703030
15	38.8	61.2	0.04		0.03	254640000	401588000	285151		190101
16
17	49.4	48.6	2			79462200	78321600	3231720
18	13.2	87.8				3611920	23667600
19	71.7	23.6	3.3		1.3	435046000	143336000	20150700		7889190
20	74.4	24.4	1.23885			128508000	42107400	1996060
21	78.9	16.6	4.5			129554000	27279500	7413940
22	65.3	34.7				40966700	21766600
23
24	43.5	54.1	2.4			102559000	127463000	5703030
25	28.5	70.6	0.885559			78701800	194473000	2376260
26	40.4	58	1.6			90393000	129554000	3611920
27	32.3	54.4	2.3			33457800	67675900	2376260
28	60.8	38.7	0.5			85450400	54368900	760404
29	69	27.5	3.47826			179170000	71477900	9219890
30	81.1	18.4	0.497288			169665000	38400400	1140610
31	73.1	19.2	7.7			506334000	133166000	53228300
32	43.9	35	21.1			146663000	116817000	70717500
33	38.8	33.9	27.3			190576000	166243000	134021000
34	40.1	35.2	24.7			301880000	264620000	186204000
35	4	45.5	50.5			4847570	54654000	60547100
36	30.5	45.3	24.2		0.07	547586000	812967000	433715000		1235660
37
38	45.4	24.1	30.5			210252000	111304000	141055000
39	15.5	67.4	17.1			28990400	125657000	31841900
40	50	28.1	21.9			253880000	142576000	111209000
41	31.7	46.9	21.4			117768000	174608000	79557200
42	43.1	46.3	10.6			163107000	174893000	39921200
43	5.6	69.5	24.7		0.46	15493200	201222000	71382900		1330710
44	30.4	51.9	17.7			160350000	274126000	93434600
45	38.4	48	13.6			351877000	439703000	124611000
46	3.03726	52.9607	44.002			10930800	196469000	162916000
47	20.8	70.6	8.5	0.1		27184400	92484100	11120900	190101
48	28	58.3	13.7			21576500	44958900	10550600
49	32	42.4	25.6			182972000	242854000	146663000
50	19.2	49.3	31.4	0.1		55889700	143146000	91248400
51	29.4	9.1	61.5			11025900	3421820	23002200
52	12.4	75.9	11.7			2946560	17964500	2756460
53	59.8	36.7	3.5			14257600	8744640	855454
54	8.2	55.2	36.6			6558480	43913300	29085400
55	34.6	63.5	1.9			30606200	56174800	1710910
56	62.3	37.0695	0.607698			87731600	52182700	855454
57	17.6	77.5	4.9236			9980300	43913300	2756460
58	17.3	75.9	6.8			2186160	9600100	855454
59	7.9	85.3	6.8			1425760	15398200	1235660
60	6.9	86.6	6.5			1615860	20245700	1520810
61	27.9261	52.3614	19.7125
62	16.8	70.1	13.1			7794140	32602300	6083230
63	71.8	28.2				17394200	6843630
64	35	60.3113	4.6			68721500	118338000	9029790
65	30.8	64.5	4.5	0.2		16919000	35453800	2471310	95050.5
66	55.4	44.6				38685500	31176500
67	44.5	53.3	2.2			193333000	231258000	9695150
68	74.5	25.3	0.1		0.05	429438000	145902000	475252		285151
69	89.2	8.4	2.4			50376700	4752520	1330710
70	83.2	16.8				46669800	9410000
71	75.7	24.3				61402600	19675400
72	71.6	20.6	7.7			34313200	9885250	3706970
73	91	4.5	4.5			96856400	4752520	4847570
74	89.2424	10.7576				56555000	6843630
75	68.6	30.6	0.8			98092100	43723200	1235660
76	63.6	19.5	8.8	8.1		16443700	5037670	2281210	2091110
77	80.3	6.7	8.4	4.6		233824000	19580400	24332900	13402100
78	94.6	2.9	2.1		0.4	202743000	6178280	4562420		855454
79	99.5	0.5				41061800	190101
80
81	97.6	0.2	2.2			90773200	190101	1996060
82	100					22051700
83	96.9	3.1				33172600	1045560
84	96.2	3.8				12166500	475252
85	96.7	2.4	0.9			84119600	2091110	760404
86	96.5909	2.99043	0.41866			152461000	4752520	665353
87
88	45.8	54.2				5703030	6748580
89	30.9524	69.0476
90	78.2609	21.7391
91	65.9091	31.8182	2.27273
92	89.4309	8.94309	1.62602
93	64.5	31.2	4.3			37354800	18059600	2471310
94	70.3	24.8	4.88372			116627000	41156800	8174340
95	26.9	65.4	7.7			665353	1615860	190101
96	38.4	55.4	6.2			49046000	70717500	7984240
97
98
99	18.6	81.4				4942620	21671500
100	7.3	90.7	2			2376260	29655700	665353
101
102
103	92	7.3	0.7			11976400	950505	95050.5
104
105
106
107
108	93.4	6.6				5417880	380202
109	52.1888	32.2802	15.531			128033000	79177000	38210300
110	95.9	1.6	0.2	2.3431		108453000	1805960	285151	2566360
111	75.3	14	9.5	1	0.2	190861000	35643900	24047800	2471310	570303
112	76.5	5.9	6.6	11.1		21006200	1615860	1805960	3041610
113	38.8	14	12.9	34.3		30321100	11025900	10075300	26804200
114	98	2				4657470	95051
115	48.5	35.8	12.4	3.3		29655700	21861600	7604040	1996060
116	84.5	6.8		8.8		20150700	1615860		2091110
117	38.5	35.2	8.4	17.9		51042100	46669800	11216000	23667600
118	39.9	18.1	18.1	23.9		33172600	15018000	15018000	19865500
